# Supplementary material for: H2A.Z marks antisense promoters and has positive effects on antisense transcript levels in budding yeast
Source: PubMed Central journal article supplement (PMC4337092; doi:10.1186/s12864-015-1247-4), 2015-02-19
Supplement: 12864_2015_1247_MOESM1_ESM.pdf [file 12864_2015_1247_MOESM1_ESM.pdf]

1 **Gu et al/ Supplemental Figure Legends**

2

3 **Figure S1. 3' end enrichment of Htz1 is not an artefact of antibody**  
4 **cross-reactivity.**

5 The  $\alpha 660$  antibodies used in this study have been previously shown to be  
6 highly specific for Htz1 in ChIP [1] but had not been tested across the whole  
7 genome in ChIP-seq experiments. To rule out any possibility that the  
8 enrichment of Htz1 in the CDS and 3' ends of genes was artefactual, we  
9 performed ChIP-seq using this antibody to immunoprecipitate ChIP extracts  
10 generated from an *htz1 $\Delta$*  strain. The pattern of enrichment in the *htz1 $\Delta$*  strain  
11 was completely different from the wild-type (WT) Htz1 pattern (Pearson  
12 correlation,  $r = -0.03$ ) and lacked the peaks seen in the WT sample.

13 **A.** Normalized ChIP signal from *htz1 $\Delta$*  (upper) and *WT* (lower) cells along  
14 chromosome 1, with the coordinates displayed at the bottom. Only the coding  
15 regions of a few very highly expressed genes had detectable signal in the  
16 *htz1 $\Delta$*  sample and enrichment at these “hyper-ChIPable” loci is a known  
17 artefact in ChIP that is not antibody-related [2]. This confirms that the anti-  
18 Htz1 antibody is not precipitating DNA in an Htz1-independent manner. The  
19 labeled peaks correspond to: 1, *YAL038W/CDC19*; 2, *tP(UGG)A*; 3,  
20 *YAL003W/EFP1*; 4, *tA(UCG)A*; 5, *tL(CAA)A*; 6, *tS(AGA)A*.

21 **B.** Zoomed in views of peaks 1 (*YAL038W/CDC19*; left), and peaks 5 and 6  
22 (*tL(CAA)A*, *tS(AGA)A*; right) on chromosome 1. ORF and “SGD Other”  
23 annotations on the + and – strands are indicated at the right, and key features  
24 are labeled for orientation purposes.

25 **C.** Htz1 enrichment at three of the genes shown in Figure 3A in the WT and  
26 *htz1*Δ strains. There is no enrichment detectable in the *htz1*Δ sample, either at  
27 the 5' or 3' ends of the genes.

28 **D.** The average signal at the 3' ends of genes is zero in the *htz1*Δ sample and  
29 is significantly lower than the WT sample ( $p = 0$ ; *t*-test).

30

31 **Figure S2: Coding region Htz1 peaks co-localise with AS transcripts.**

32 **A.** Examples of Htz1 peaks in the mid-coding region overlapping with the start  
33 of AS transcripts, as indicated by the arrows. Colour coding is as for Figure  
34 3A.

35 **B.** The fraction of Htz1-enriched regions in CDSs associated with AS  
36 transcripts is 10% (307 out of 3044). We speculate that other Htz1 peaks in  
37 the CDS are also transcript-associated but that these transcripts are not  
38 detectable either because they are derived from the sense strand or because  
39 they are unstable even in the *rrp6*Δ strain.

40 **C.** Comparison of the number of CDS Htz1 peaks associated with AS  
41 transcripts (green line) to the distribution of random CDS regions (black bars)  
42 that co-localise with AS transcripts. 307/3044 CDS windows with Htz1  
43 enrichment are associated with AS transcripts. 3044 random windows were  
44 drawn from a total set of 38599 windows and randomisation was repeated 100  
45 times to generate the histogram. The association of CDS Htz1 peaks with AS  
46 transcripts, although lower than the association of 3' Htz1 peaks with AS  
47 transcripts (Figure 3D), is highly significant ( $p = 1.6 \times 10^{-87}$ ; Fisher's exact  
48 test).

49

50 **Figure S3: Effect of Htz1 on sense transcript levels.**

51 **A.** Comparison of differential sense transcript levels in *rrp6Δhtz1Δ* versus

52 *rrp6Δ* to Htz1 levels at the 5' ends of genes. Each gene is shown as an open

53 circle, with its 5' Htz1 level measured by ChIP-seq being the y-value and its

54 fold change of expression in the *rrp6Δhtz1Δ* strain shown as its x-value.

55 Significantly up- and down-regulated transcripts are coloured in light blue and

56 pink respectively.

57 **B.** Boxplots of the distributions of 5' Htz1 levels for down- ( $n = 267$ ) and up- ( $n$

58  $= 255$ ) regulated sense transcripts, show that down-regulated S transcripts

59 are significantly enriched for Htz1 (\*\*\*\*  $p \leq 0.0001$  ( $3.6 \times 10^{-5}$ ); two-tailed  $t$ -

60 test) compared to transcripts whose expression doesn't change ( $n = 2921$ ).

61 **C.** Actual (solid bars) and expected (hatched bars) numbers of up-/down-

62 regulated antisense transcripts with and without 5' Htz1. Down-regulated

63 sense transcripts with 5' Htz1 are significantly more numerous than expected

64 (\*\*\*)  $p \leq 0.001$  ( $4.2 \times 10^{-4}$ ); Fisher's exact test) while up-regulated transcripts

65 are less numerous than expected (\*\*\*\*  $p \leq 0.0001$  ( $2.4 \times 10^{-14}$ ); Fisher's exact

66 test).

67 **D.** There is no obvious correlation between enrichment of Htz1 at the 5' end of

68 genes and level of the associated sense transcript. Genes were classified into

69 bins of seven quantiles according to 5' Htz1 level and the distribution of

70 sense transcript levels are plotted for each bin.

71

72 **Figure S4: Tandem-close genes have higher Htz1 at 3' ends than genes**  
73 **of other arrangements.**

74 Distributions of levels of Htz1 at 3' ends for tandem-close, tandem-far,

75 convergent-close and convergent-far genes. The amount of Htz1 within a  
76 150bp window upstream of TESs is displayed. Two-tailed *t*-tests show that the  
77 level of 3' Htz1 at tandem-close genes is significantly higher relative to levels  
78 in the other categories of genes (\*\*\*\*  $p \leq 0.0001$ ; tandem far  $p = 2.5 \times 10^{-43}$  ;  
79 convergent close  $p = 1.5 \times 10^{-137}$ ; convergent far  $p = 1.8 \times 10^{-18}$ ;) )

80

81

82 **Supplemental Tables.**

83

84 **Table S1. Correlations between samples.**

85

86 **A. Pearson correlations between ChIP-seq experiments.**

| <b>Genotype</b>                    | <b>WT (772)<br/>replicate 1</b> | <b>WT (772)<br/>replicate 2</b> | <b>rrp6Δ (884)<br/>replicate 1</b> | <b>rrp6Δ (884)<br/>replicate 2</b> |
|------------------------------------|---------------------------------|---------------------------------|------------------------------------|------------------------------------|
| <b>WT (772)<br/>replicate 1</b>    | 1                               | 0.99                            | 0.94                               | 0.97                               |
| <b>WT (772)<br/>replicate 2</b>    |                                 | 1                               | 0.95                               | 0.97                               |
| <b>rrp6Δ (884)<br/>replicate 1</b> |                                 |                                 | 1                                  | 0.96                               |
| <b>rrp6Δ (884)<br/>replicate 2</b> |                                 |                                 |                                    | 1                                  |

87

88

89 **B. Pearson correlations between biological replicates for RNA-seq**

90 experiments.

| <b>Genotype</b>                       | <b>WT rep1</b> | <b>WT rep2</b> | <b>htz1Δ<br/>rep1</b> | <b>htz1Δ<br/>rep2</b> | <b>rrp6Δ<br/>rep1</b> | <b>rrp6Δ<br/>rep2</b> | <b>rrp6Δhtz1Δ<br/>rep1</b> | <b>rrp6Δhtz1Δ<br/>rep2</b> |
|---------------------------------------|----------------|----------------|-----------------------|-----------------------|-----------------------|-----------------------|----------------------------|----------------------------|
| <b>WT (772)<br/>rep1</b>              | 1              | 0.99           | 0.98                  | 0.98                  | 0.96                  | 0.95                  | 0.93                       | 0.93                       |
| <b>WT (772)<br/>rep2</b>              |                | 1              | 0.99                  | 0.99                  | 0.96                  | 0.96                  | 0.94                       | 0.94                       |
| <b>htz1Δ (773)<br/>rep1</b>           |                |                | 1                     | 0.99                  | 0.95                  | 0.94                  | 0.94                       | 0.94                       |
| <b>htz1Δ (773)<br/>rep2</b>           |                |                |                       | 1                     | 0.96                  | 0.96                  | 0.95                       | 0.96                       |
| <b>rrp6Δ (884)<br/>rep1</b>           |                |                |                       |                       | 1                     | 0.99                  | 0.96                       | 0.96                       |
| <b>rrp6Δ (884)<br/>rep2</b>           |                |                |                       |                       |                       | 1                     | 0.96                       | 0.97                       |
| <b>rrp6Δhtz1<br/>Δ (885)<br/>rep1</b> |                |                |                       |                       |                       |                       | 1                          | 0.99                       |
| <b>rrp6Δhtz1<br/>Δ (885)<br/>rep2</b> |                |                |                       |                       |                       |                       |                            | 1                          |

91

92

93 **Table S2. *S. cerevisiae* genotypes.** All strains are derived from Y7092  
 94 [3].

| Name   | Genotype                                                                                                                                                                                                                              | Reference  |
|--------|---------------------------------------------------------------------------------------------------------------------------------------------------------------------------------------------------------------------------------------|------------|
| CMY772 | <i>MAT<math>\alpha</math> can1<math>\Delta</math>::STE2pr-SP_his5 lyp1<math>\Delta</math> his3<math>\Delta</math>1 ura3<math>\Delta</math>0 met15<math>\Delta</math>0 HTZ1-HpH</i>                                                    | This study |
| CMY773 | <i>MAT<math>\alpha</math> can1<math>\Delta</math>::STE2pr-SP_his5 lyp1<math>\Delta</math> his3<math>\Delta</math>1 ura3<math>\Delta</math>0 met15<math>\Delta</math>0 htz1<math>\Delta</math>::HpH</i>                                | This study |
| CMY884 | <i>MAT<math>\alpha</math> can1<math>\Delta</math>::STE2pr-SP_his5 lyp1<math>\Delta</math> his3<math>\Delta</math>1 ura3<math>\Delta</math>0 met15<math>\Delta</math>0 HTZ1-HpH rrp6<math>\Delta</math>::KanMX</i>                     | This study |
| CMY885 | <i>MAT<math>\alpha</math> can1<math>\Delta</math>::STE2pr-SP_his5 lyp1<math>\Delta</math> his3<math>\Delta</math>1 ura3<math>\Delta</math>0 met15<math>\Delta</math>0 htz1<math>\Delta</math>::HpH rrp6<math>\Delta</math>::KanMX</i> | This study |

95  
 96 **Table S3.** Summary of all samples generated in this study and the number of  
 97 uniquely mapped reads per sample.

| Experiment | Strain                                                                     | # uniquely mapped reads |
|------------|----------------------------------------------------------------------------|-------------------------|
| ChIP-seq   | WT (CMY772) replicate 1                                                    | 14,697,299              |
| ChIP-seq   | WT (CMY772) replicate 2                                                    | 13,231,718              |
| ChIP-seq   | <i>htz1<math>\Delta</math></i> (CMY773)                                    | 8,661,572               |
| ChIP-seq   | <i>rrp6<math>\Delta</math></i> (CMY884) replicate 1                        | 11,977,811              |
| ChIP-seq   | <i>rrp6<math>\Delta</math></i> (CMY884) replicate 2                        | 14,502,522              |
| ChIP-seq   | Input DNA                                                                  | 15,300,627              |
| RNA-seq    | WT (CMY772) replicate 1                                                    | 31,405,138              |
| RNA-seq    | WT (CMY772) replicate 2                                                    | 23,038,629              |
| RNA-seq    | <i>htz1<math>\Delta</math></i> (CMY773) replicate 1                        | 23,119,171              |
| RNA-seq    | <i>htz1<math>\Delta</math></i> (CMY773) replicate 2                        | 32,566,862              |
| RNA-seq    | <i>rrp6<math>\Delta</math></i> (CMY884) replicate 1                        | 57,034,365              |
| RNA-seq    | <i>rrp6<math>\Delta</math></i> (CMY884) replicate 2                        | 39,591,473              |
| RNA-seq    | <i>rrp6<math>\Delta</math>htz1<math>\Delta</math></i> (CMY885) replicate 1 | 47,638,662              |
| RNA-seq    | <i>rrp6<math>\Delta</math>htz1<math>\Delta</math></i> (CMY885) replicate 2 | 27,925,445              |

98  
 99

100 **Supplemental References.**

101 1. Millar CB, Xu F, Zhang K, Grunstein M: **Acetylation of H2AZ Lys 14 is**  
 102 **associated with genome-wide gene activity in yeast.** *Genes Dev* 2006,  
 103 **20:711–722.**

104 2. Teytelman L, Thurtle DM, Rine J, van Oudenaarden A: **Highly expressed**  
 105 **loci are vulnerable to misleading ChIP localization of multiple unrelated**

106 **proteins.** *Proceedings of the National Academy of Sciences* 2013,

107 **110:**18602–18607.

108 3. Tong AHY, Tong AHY, Boone C, Boone C: **High-Throughput Strain**

109 **Construction and Systematic Synthetic Lethal Screening in.** In *Methods*

110 *in Microbiology. Volume 36.* Elsevier; 2007:369–707. [*Methods in*

111 *Microbiology*]

112
