# Supplementary material for: H2A.Z marks antisense promoters and has positive effects on antisense transcript levels in budding yeast
Source: PubMed Central journal article supplement (PMC4337092; doi:10.1186/s12864-015-1247-4), 2015-02-19

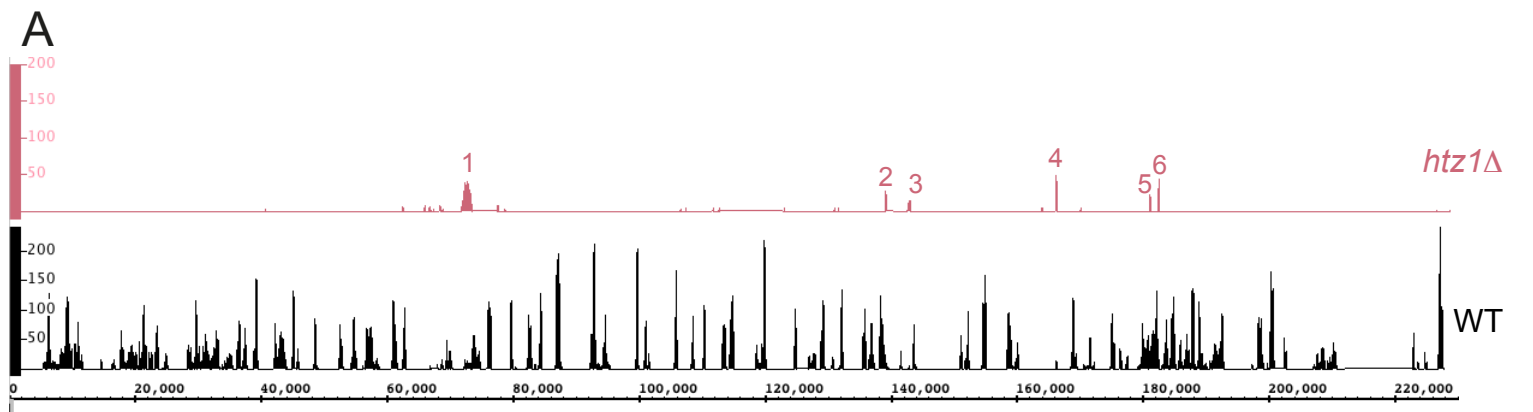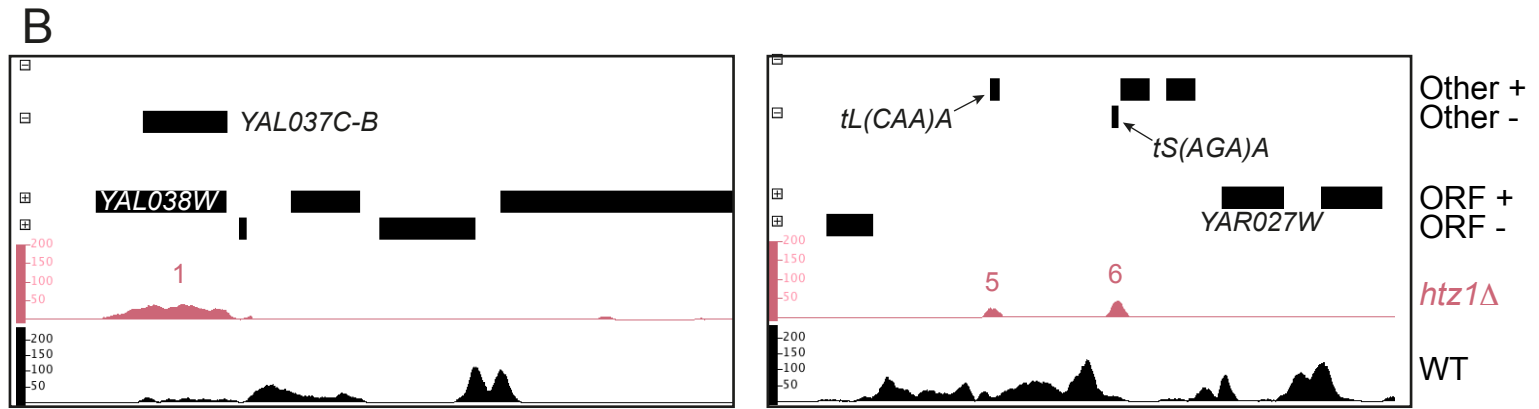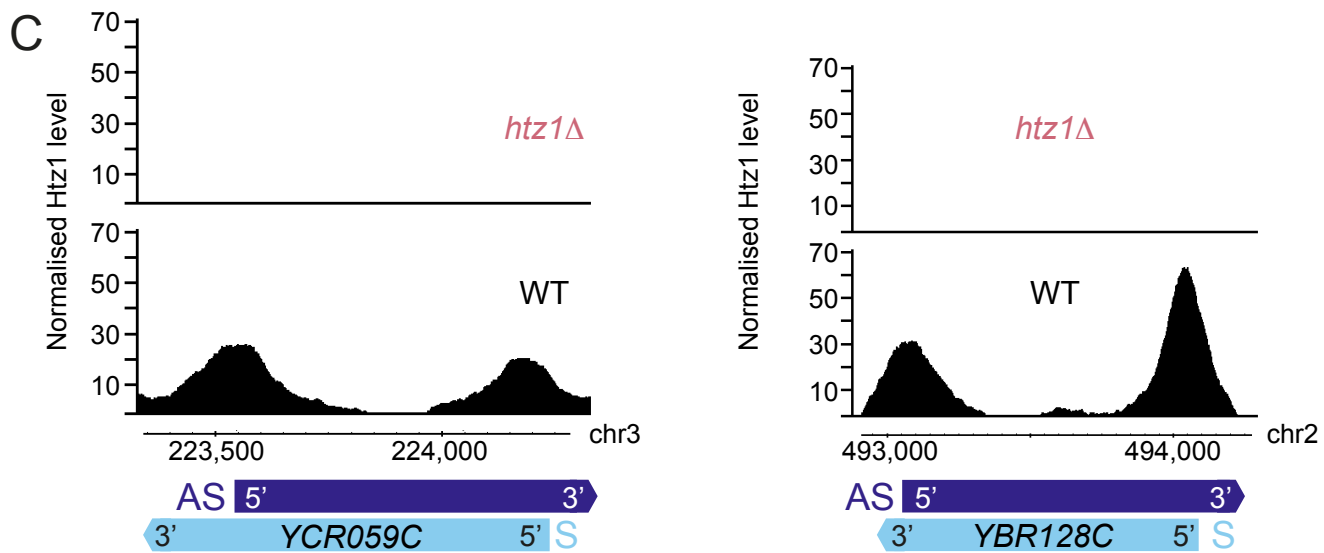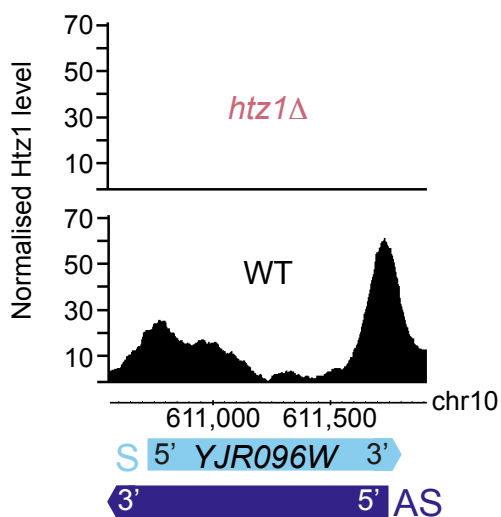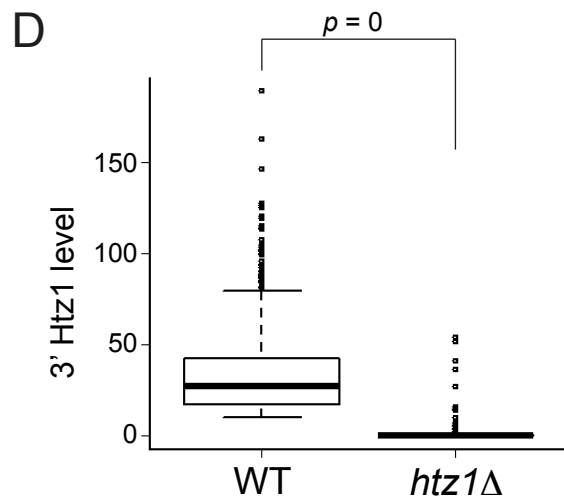

Supplement: 12864_2015_1247_MOESM2_ESM.pdf [file 12864_2015_1247_MOESM2_ESM.pdf]
